# Supplementary material
Source: MDPI journal article supplement (https://www.mdpi.com/1424-2818/15/12/1177)
Supplement: s1 [file s1]

a)

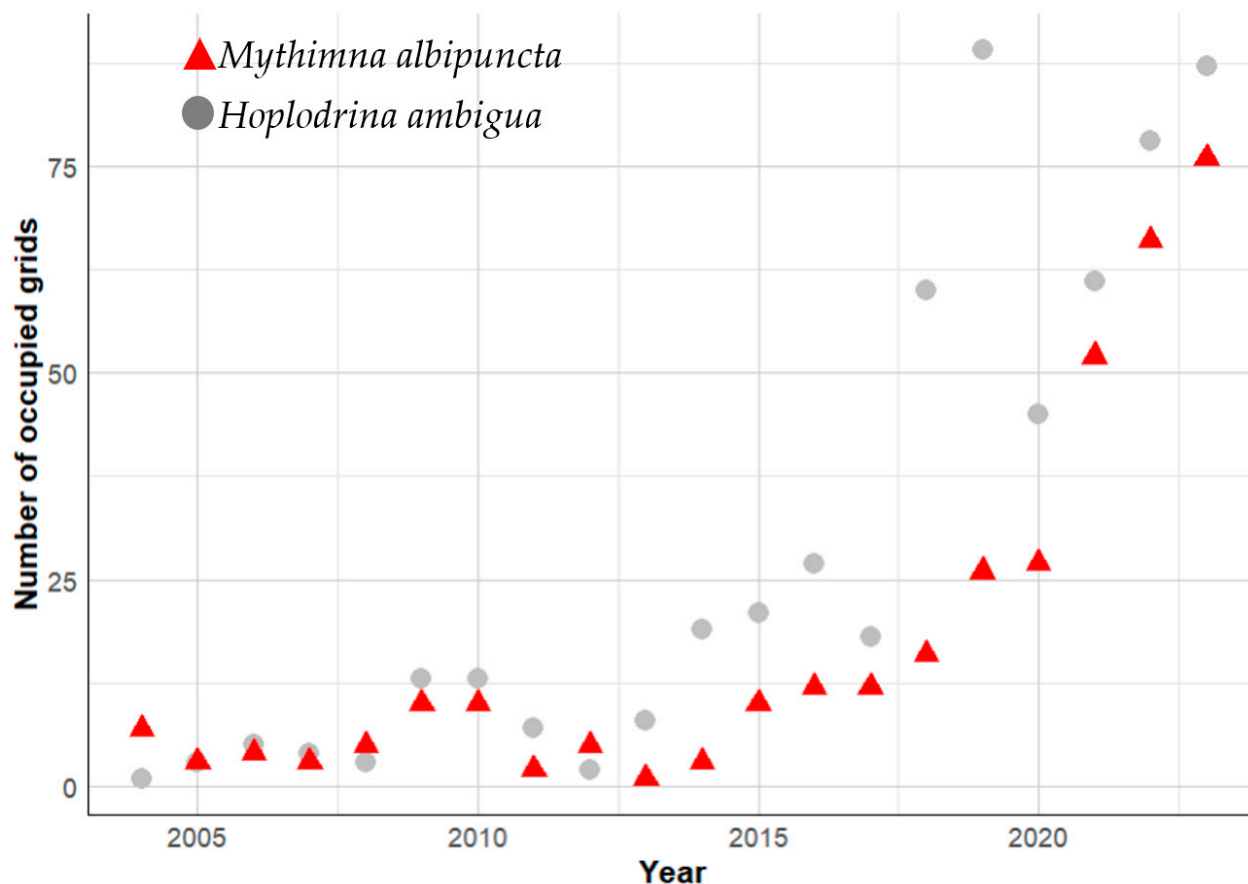

b)

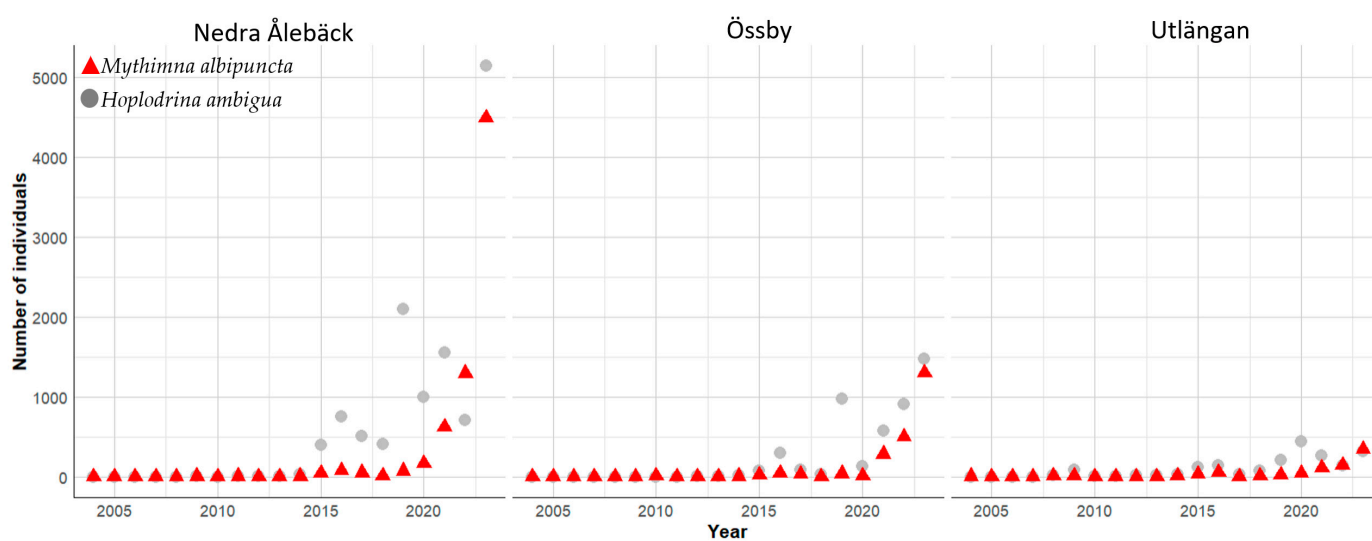

**Figure S1.** a) Distribution area (expressed as the number of occupied 60 km<sup>2</sup> grids), and b) abundance of *Mythimna albipuncta* and *Hoplodrina ambigua* during the course of the study (2004–2023). Data on distribution area refers to the Global Biodiversity Information Facility (GBIF), while data on abundance refers to the three light-traps in southeastern Sweden used in this study.

**Table S1.** The recorded abundance of *Mythimna albipuncta* and *Hoplodrina ambigua* per trap and year.

| Species             | Site          | Year | Individuals |
|---------------------|---------------|------|-------------|
| Hoplodrina ambigua  | Nedre aleback | 2004 | 0           |
| Hoplodrina ambigua  | Ossby         | 2004 | 0           |
| Hoplodrina ambigua  | Utlangan      | 2004 | 0           |
| Mythimna albipuncta | Nedre aleback | 2004 | 0           |
| Mythimna albipuncta | Ossby         | 2004 | 0           |
| Mythimna albipuncta | Utlangan      | 2004 | 7           |
| Hoplodrina ambigua  | Nedre aleback | 2005 | 0           |
| Hoplodrina ambigua  | Ossby         | 2005 | 0           |
| Hoplodrina ambigua  | Utlangan      | 2005 | 2           |
| Mythimna albipuncta | Nedre aleback | 2005 | 1           |
| Mythimna albipuncta | Ossby         | 2005 | 3           |
| Mythimna albipuncta | Utlangan      | 2005 | 0           |
| Hoplodrina ambigua  | Nedre aleback | 2006 | 0           |
| Hoplodrina ambigua  | Ossby         | 2006 | 0           |
| Hoplodrina ambigua  | Utlangan      | 2006 | 1           |
| Mythimna albipuncta | Nedre aleback | 2006 | 1           |
| Mythimna albipuncta | Ossby         | 2006 | 4           |
| Mythimna albipuncta | Utlangan      | 2006 | 4           |
| Hoplodrina ambigua  | Nedre aleback | 2007 | 0           |
| Hoplodrina ambigua  | Ossby         | 2007 | 1           |
| Hoplodrina ambigua  | Utlangan      | 2007 | 2           |
| Mythimna albipuncta | Nedre aleback | 2007 | 0           |
| Mythimna albipuncta | Ossby         | 2007 | 4           |
| Mythimna albipuncta | Utlangan      | 2007 | 0           |
| Hoplodrina ambigua  | Nedre aleback | 2008 | 0           |
| Hoplodrina ambigua  | Ossby         | 2008 | 1           |
| Hoplodrina ambigua  | Utlangan      | 2008 | 18          |
| Mythimna albipuncta | Nedre aleback | 2008 | 2           |
| Mythimna albipuncta | Ossby         | 2008 | 1           |
| Mythimna albipuncta | Utlangan      | 2008 | 12          |
| Hoplodrina ambigua  | Nedre aleback | 2009 | 5           |
| Hoplodrina ambigua  | Ossby         | 2009 | 3           |
| Hoplodrina ambigua  | Utlangan      | 2009 | 86          |
| Mythimna albipuncta | Nedre aleback | 2009 | 8           |
| Mythimna albipuncta | Ossby         | 2009 | 6           |
| Mythimna albipuncta | Utlangan      | 2009 | 17          |
| Hoplodrina ambigua  | Nedre aleback | 2010 | 0           |
| Hoplodrina ambigua  | Ossby         | 2010 | 2           |
| Hoplodrina ambigua  | Utlangan      | 2010 | 8           |
| Mythimna albipuncta | Nedre aleback | 2010 | 3           |

|                     |               |      |     |
|---------------------|---------------|------|-----|
| Mythimna albipuncta | Ossby         | 2010 | 11  |
| Mythimna albipuncta | Utlangan      | 2010 | 1   |
| Hoplodrina ambigua  | Nedre aleback | 2011 | 9   |
| Hoplodrina ambigua  | Ossby         | 2011 | 1   |
| Hoplodrina ambigua  | Utlangan      | 2011 | 6   |
| Mythimna albipuncta | Nedre aleback | 2011 | 7   |
| Mythimna albipuncta | Ossby         | 2011 | 3   |
| Mythimna albipuncta | Utlangan      | 2011 | 2   |
| Hoplodrina ambigua  | Nedre aleback | 2012 | 14  |
| Hoplodrina ambigua  | Ossby         | 2012 | 6   |
| Hoplodrina ambigua  | Utlangan      | 2012 | 17  |
| Mythimna albipuncta | Nedre aleback | 2012 | 0   |
| Mythimna albipuncta | Ossby         | 2012 | 0   |
| Mythimna albipuncta | Utlangan      | 2012 | 0   |
| Hoplodrina ambigua  | Nedre aleback | 2013 | 8   |
| Hoplodrina ambigua  | Ossby         | 2013 | 4   |
| Hoplodrina ambigua  | Utlangan      | 2013 | 21  |
| Mythimna albipuncta | Nedre aleback | 2013 | 0   |
| Mythimna albipuncta | Ossby         | 2013 | 0   |
| Mythimna albipuncta | Utlangan      | 2013 | 1   |
| Hoplodrina ambigua  | Nedre aleback | 2014 | 34  |
| Hoplodrina ambigua  | Ossby         | 2014 | 24  |
| Hoplodrina ambigua  | Utlangan      | 2014 | 33  |
| Mythimna albipuncta | Nedre aleback | 2014 | 8   |
| Mythimna albipuncta | Ossby         | 2014 | 8   |
| Mythimna albipuncta | Utlangan      | 2014 | 13  |
| Hoplodrina ambigua  | Nedre aleback | 2015 | 395 |
| Hoplodrina ambigua  | Ossby         | 2015 | 76  |
| Hoplodrina ambigua  | Utlangan      | 2015 | 116 |
| Mythimna albipuncta | Nedre aleback | 2015 | 43  |
| Mythimna albipuncta | Ossby         | 2015 | 22  |
| Mythimna albipuncta | Utlangan      | 2015 | 37  |
| Hoplodrina ambigua  | Nedre aleback | 2016 | 754 |
| Hoplodrina ambigua  | Ossby         | 2016 | 294 |
| Hoplodrina ambigua  | Utlangan      | 2016 | 138 |
| Mythimna albipuncta | Nedre aleback | 2016 | 83  |
| Mythimna albipuncta | Ossby         | 2016 | 43  |
| Mythimna albipuncta | Utlangan      | 2016 | 58  |
| Hoplodrina ambigua  | Nedre aleback | 2017 | 513 |
| Hoplodrina ambigua  | Ossby         | 2017 | 88  |
| Hoplodrina ambigua  | Utlangan      | 2017 | 31  |
| Mythimna albipuncta | Nedre aleback | 2017 | 51  |

|                     |               |      |      |
|---------------------|---------------|------|------|
| Mythimna albipuncta | Ossby         | 2017 | 33   |
| Mythimna albipuncta | Utlangan      | 2017 | 4    |
| Hoplodrina ambigua  | Nedre aleback | 2018 | 408  |
| Hoplodrina ambigua  | Ossby         | 2018 | 27   |
| Hoplodrina ambigua  | Utlangan      | 2018 | 78   |
| Mythimna albipuncta | Nedre aleback | 2018 | 9    |
| Mythimna albipuncta | Ossby         | 2018 | 4    |
| Mythimna albipuncta | Utlangan      | 2018 | 17   |
| Hoplodrina ambigua  | Nedre aleback | 2019 | 2098 |
| Hoplodrina ambigua  | Ossby         | 2019 | 980  |
| Hoplodrina ambigua  | Utlangan      | 2019 | 206  |
| Mythimna albipuncta | Nedre aleback | 2019 | 73   |
| Mythimna albipuncta | Ossby         | 2019 | 40   |
| Mythimna albipuncta | Utlangan      | 2019 | 24   |
| Hoplodrina ambigua  | Nedre aleback | 2020 | 1000 |
| Hoplodrina ambigua  | Ossby         | 2020 | 128  |
| Hoplodrina ambigua  | Utlangan      | 2020 | 447  |
| Mythimna albipuncta | Nedre aleback | 2020 | 167  |
| Mythimna albipuncta | Ossby         | 2020 | 10   |
| Mythimna albipuncta | Utlangan      | 2020 | 50   |
| Hoplodrina ambigua  | Nedre aleback | 2021 | 1553 |
| Hoplodrina ambigua  | Ossby         | 2021 | 575  |
| Hoplodrina ambigua  | Utlangan      | 2021 | 265  |
| Mythimna albipuncta | Nedre aleback | 2021 | 624  |
| Mythimna albipuncta | Ossby         | 2021 | 284  |
| Mythimna albipuncta | Utlangan      | 2021 | 112  |
| Hoplodrina ambigua  | Nedre aleback | 2022 | 705  |
| Hoplodrina ambigua  | Ossby         | 2022 | 912  |
| Hoplodrina ambigua  | Utlangan      | 2022 | 143  |
| Mythimna albipuncta | Nedre aleback | 2022 | 1295 |
| Mythimna albipuncta | Ossby         | 2022 | 500  |
| Mythimna albipuncta | Utlangan      | 2022 | 142  |
| Hoplodrina ambigua  | Nedre aleback | 2023 | 5137 |
| Hoplodrina ambigua  | Ossby         | 2023 | 1477 |
| Hoplodrina ambigua  | Utlangan      | 2023 | 323  |
| Mythimna albipuncta | Nedre aleback | 2023 | 4491 |
| Mythimna albipuncta | Ossby         | 2023 | 1297 |
| Mythimna albipuncta | Utlangan      | 2023 | 348  |
